# Supplementary material for: Relationship between Tertiary Lymphoid Structure and the Prognosis and Clinicopathologic Characteristics in Solid Tumors
Source: PubMed Central journal article supplement (PMC8100653; doi:10.7150/ijms.56347), 2021-04-07
Supplement: ijmsv18p2327s1.pdf [file ijmsv18p2327s1.pdf]

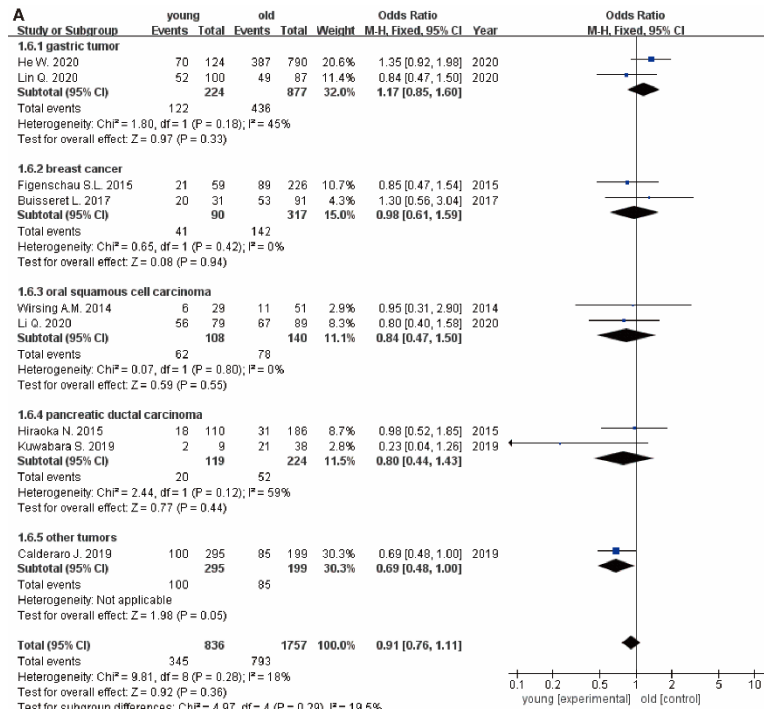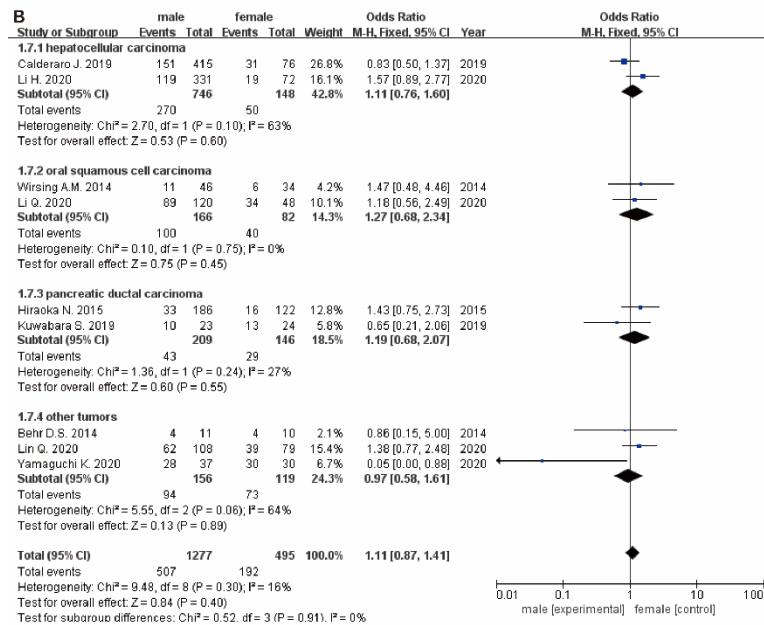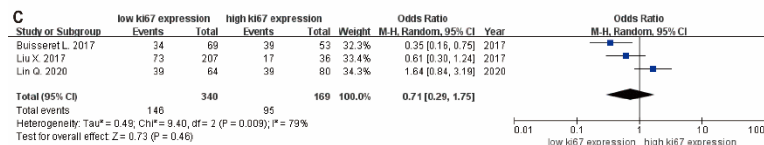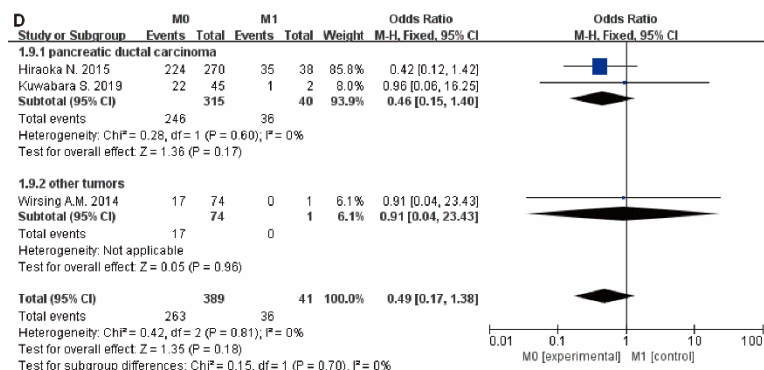

**Supplementary Figure 1. The forest plot of OR was assessed for association between TLS and clinicopathological features: (A) age; (B) gender; (C) ki67 expression; (D) M stage. Each result was shown by the OR with 95% CI.**

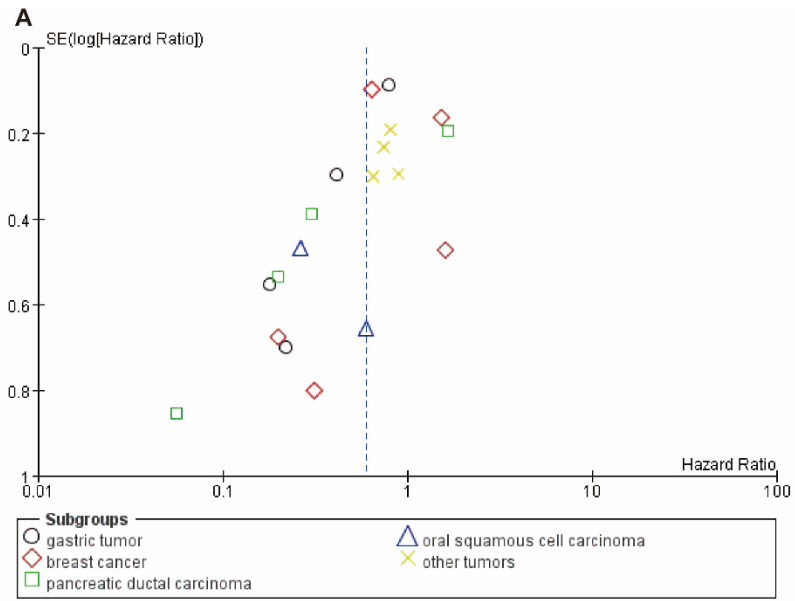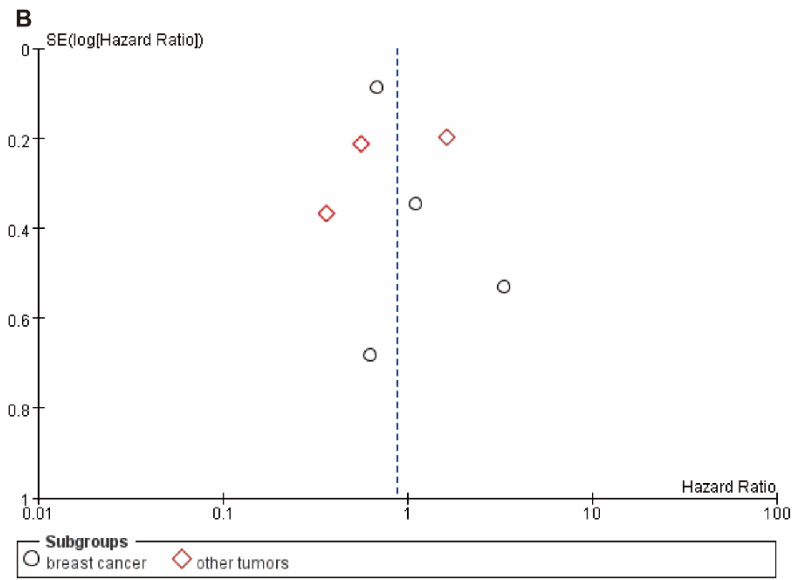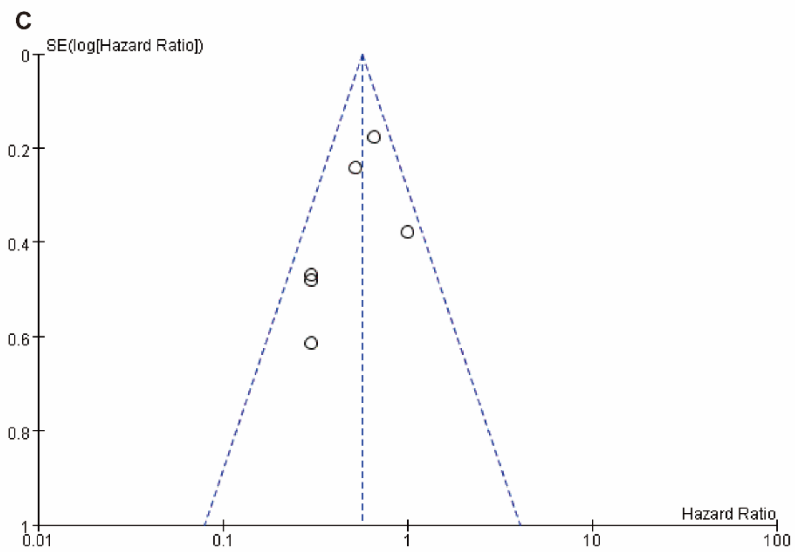

**Supplementary Figure 2. Funnel plots of the association between TLS with survival: (A) OS; (B) DFS; (C) RFS.**

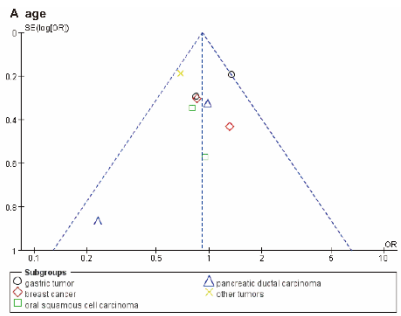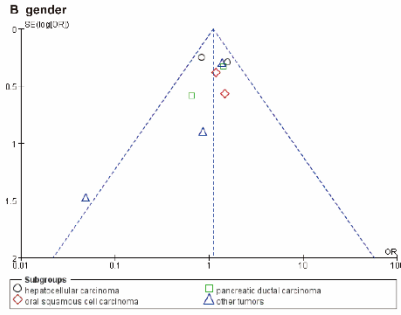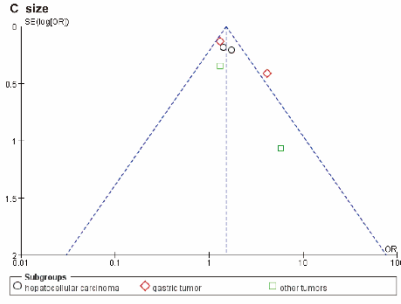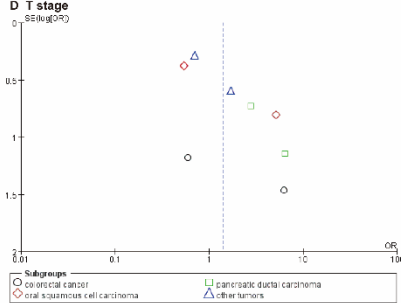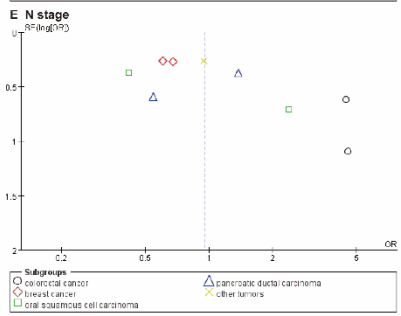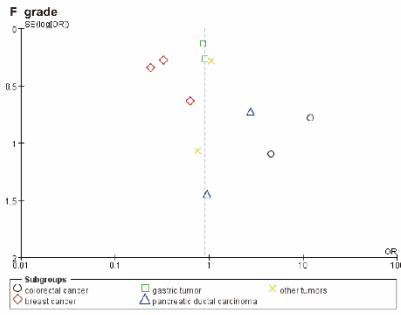

**Supplementary Figure 3. Funnel plots of the association between TLS expression with other clinicopathological characteristics: (A): age; (B): gender; (C): size; (D): T stage; (E): N stage; (F): grade.**
